# Supplementary material for: Boron nitride-mediated semiconductor nanonetwork for an ultralow-power fibrous synaptic transistor and C-reactive protein sensing
Source: Royal Society of Chemistry journal article supplement (doi:10.1039/d2tc05426d), 2023-01-01
Supplement: d2tc05426d1.pdf [file d2tc05426d1.pdf]

# Boron nitride-mediated semiconductor nanonetwork for ultralow-power fibrous synaptic transistor and C- reactive protein sensing

Mufang Li<sup>1†</sup>, Qing Shu<sup>1†</sup>, Xing Qing<sup>1\*</sup>, Jianmei Wu<sup>1</sup>, Qing Xiao<sup>1</sup>, Kangyu Jia<sup>1</sup>, Xungai Wang<sup>2</sup>,  
Dong Wang<sup>1\*</sup>

<sup>1</sup>Key Laboratory of Textile Fiber and Products (Wuhan Textile University), Ministry of Education,  
Wuhan Textile University, Wuhan, 430200, China

<sup>2</sup>JC STEM Lab of Sustainable Fibers and Textiles, School of Fashion and Textiles, The Hong  
Kong Polytechnic University, Hung Hom, Kowloon, Hong Kong, China

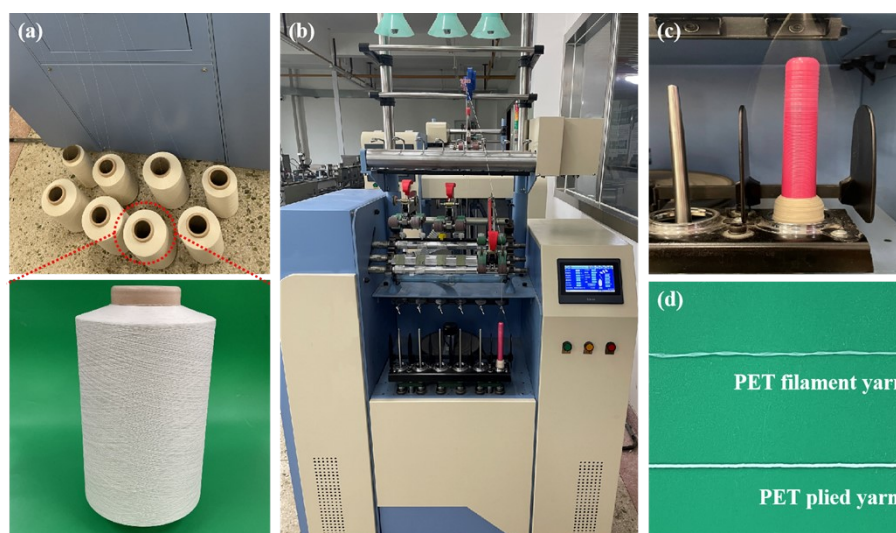

**Fig. S1.** (a)-(c) the spinning frame machine, eight commercial hydrophobic polyester (PET) filament yarns (75D/72f) were twisting together to manufacture the PET plied yarn. (d) the photographs of PET filaments and twisted PET yarns.

<sup>†</sup>These authors contributed equally.

\*Corresponding authors: (Q.X.) E-mail: [794315726@qq.com](mailto:794315726@qq.com), (D.W.) E-mail: [wangdon08@126.com](mailto:wangdon08@126.com);

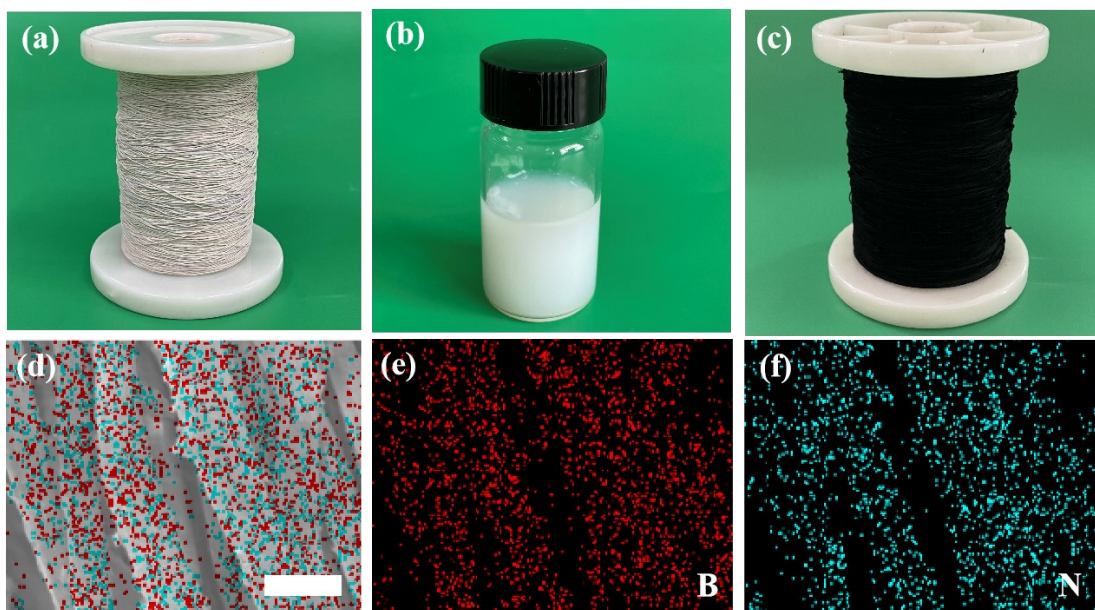

**Fig. S2.** Optical images of PET (a), FBN colloid solution (b), PPY/FBN/PET electrode (c), optical image of PPY/FBN/PET electrode, (d) the EDS images of FBN/PET electrode, (e) the B element and (f) N element.

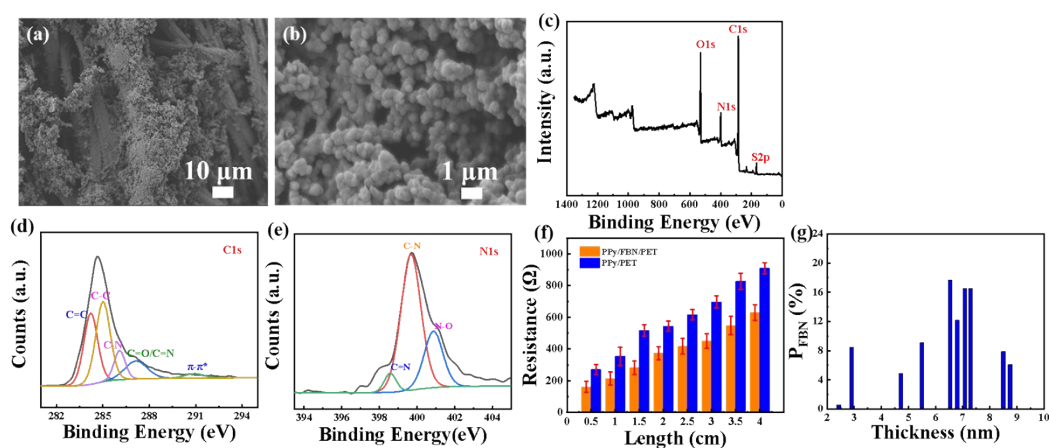

**Fig. S3.** (a)-(b) SEM images of PPY/PET, (c) XPS survey spectra of PPY/FBN/PET, (d) C1s and (e) N1s spectra. (f) the resistances of PPY/PET and PPY/FBN/PET with different measuring length. (g) FBN sheets counted from their AFM images. The average thickness of FBN is 6.05 nm.

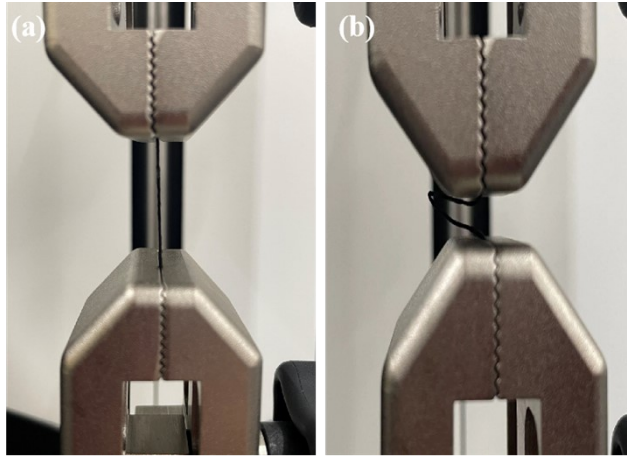

**Fig. S4.** The bending stability test of PPy/FBN/PET electrode by Mark 10 Force Gauges.

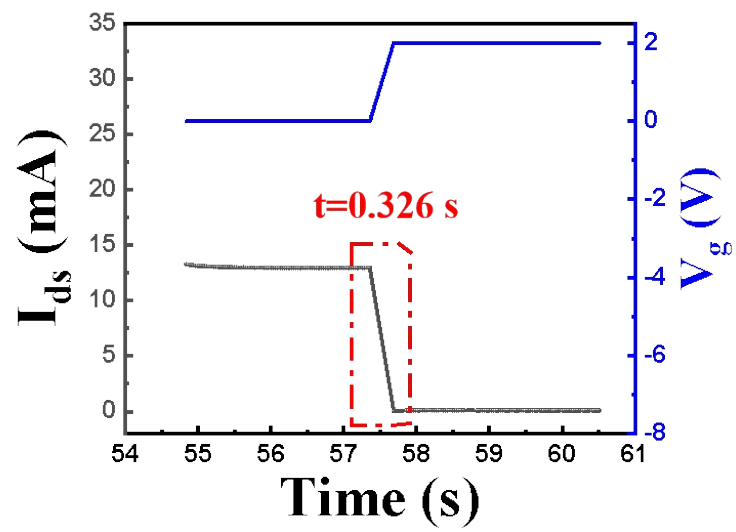

**Fig. S5.** The tenth switch cycle of FOECT, the response time is 0.326 s.

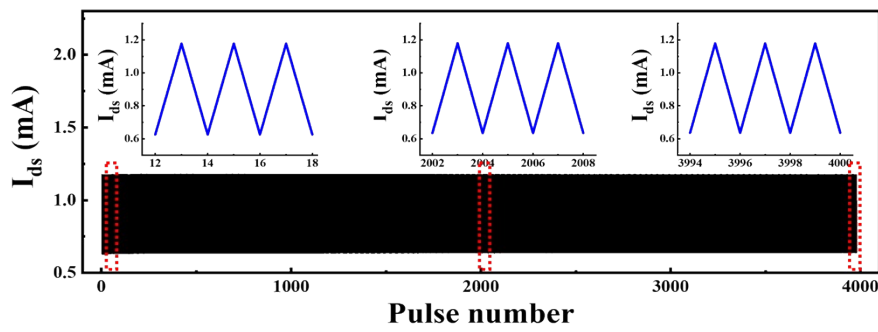

**Fig. S6.** EPSC stability of synaptic FOECT for 4000 cycles ( $V_g=1$  V, 25 ms)

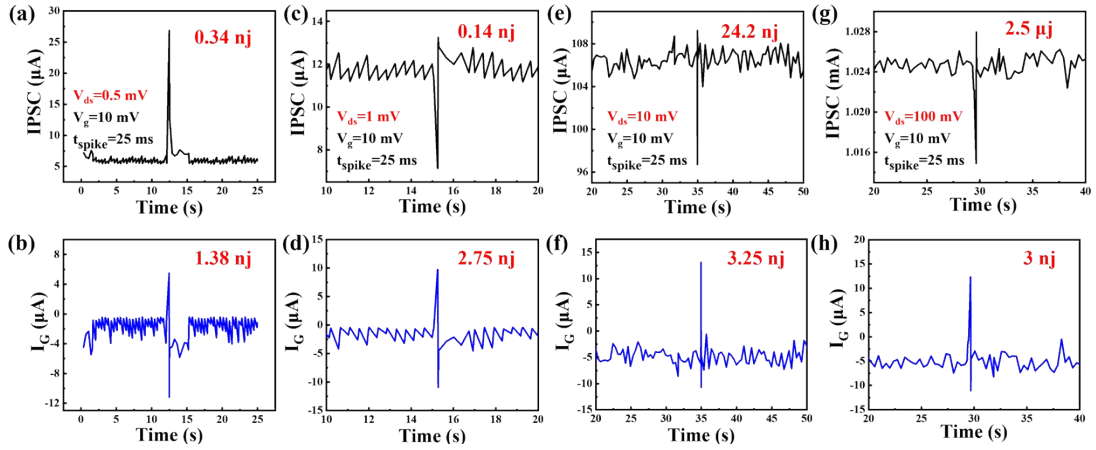

**Fig. S7.** Power consumption at different  $V_{ds}$  ( $V_g=10$  mV, 25 ms). (a) IPSC and (b) gate power consumption at  $V_{ds}=0.5$  mV. (c) IPSC and (d) gate power consumption at  $V_{ds}=1$  mV. (e) IPSC and (f) gate power consumption at  $V_{ds}=10$  mV. (g) IPSC and (h) gate power consumption at  $V_{ds}=100$  mV.

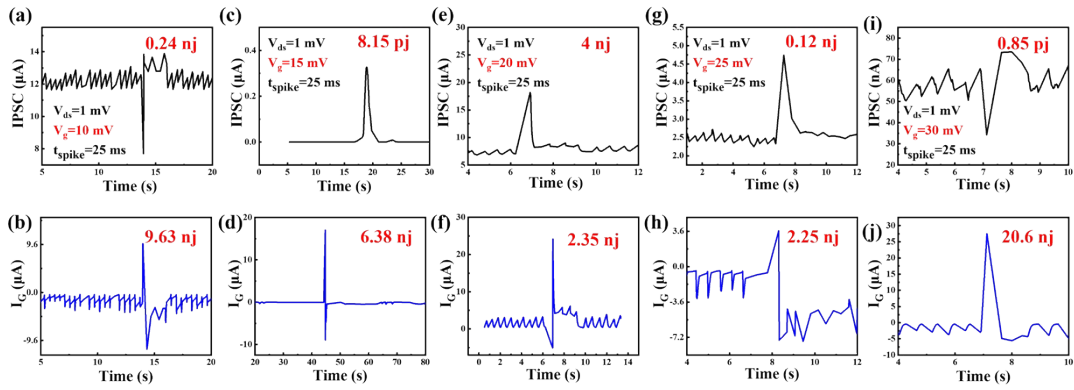

**Fig. S8.** Power consumption at different  $V_g$  ( $V_{ds}=1$  mV, spike width 25 ms). (a) IPSC and (b) gate power consumption at  $V_g=10$  mV. (c) IPSC and (d) gate power consumption at  $V_g=15$  mV. (e) IPSC and (f) gate power consumption at  $V_g=20$  mV. (g) IPSC and (h) gate power consumption at  $V_g=25$  mV. (i) IPSC and (j) gate power consumption at  $V_g=30$  mV.
